# Supplementary material for: PRAP-CVD: how to design high conformal PEDOT surfaces
Source: Royal Society of Chemistry journal article supplement (doi:10.1039/c7ra00343a), 2017-01-01
Supplement: c7ra00343a1.pdf [file c7ra00343a1.pdf]

## *Electronic Supplementary Information*

### **PRAP-CVD: how to design high conformal PEDOT surfaces**

Bianca Rita Pistillo\*, Kevin Mengueli, Didier Arl, Frédéric. Addiego and Damien Lenoble

*Department of Materials Research and Technology, Luxembourg Institute of Science and Technology,*

*5, Avenue des Hauts Fourneaux, L-4326 Esch sur Alzette, Luxembourg. E-mail:*

*biancarita.pistillo@list.lu; Fax: +352 27 58 85; Tel: +352 47 02 61 586*

***RSC-Advances***

\*Corresponding author

E-mail: biancarita.pistillo@list.lu / Tel. +352 275.888.586

An electron beam (EB) generated by a scanning electron microscope (SEM) was used to irradiate two samples having different electrical conductive behaviour, and the resulting response was reported in the video S1. The experimental parameters were: voltage of 500V, current of 13 pA, horizontal field width of 2.07mm and acquisition time of 20s. Any further numerical post-treatment was applied.

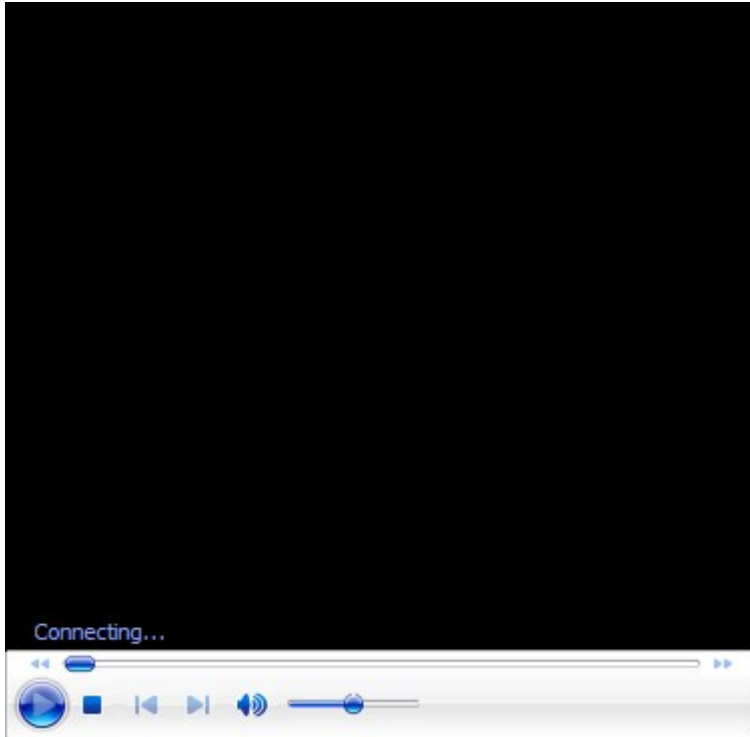

**S2:** Behaviour of PET fabric covered with PEDOT and raw one under electron beam irradiation.

The charging characteristics of the no-conductive material as raw PET sample under electron beam irradiation is quite evident in S2 compared to PEDOT, which exhibits its conductive behaviour, begin stable all along the video shot.

This is an additional proof of homogeneous deposition of PRAP-CVD PEDOT film on PET fabrics.
